# Supplementary material
Source: PubMed Central journal article supplement (PMC2798181)
Supplement: supp_78_1_413__1.pdf [file supp_78_1_413__1.pdf]

**Table S1. Bacterial strains and plasmids used in this study**

| Strain or plasmid                    | Relevant characteristics                                                                                                                                                                                                   | Source or reference |
|--------------------------------------|----------------------------------------------------------------------------------------------------------------------------------------------------------------------------------------------------------------------------|---------------------|
| <i>S. gordonii</i> strains           |                                                                                                                                                                                                                            |                     |
| CH1                                  | Parental strain Challis (sequenced genome)                                                                                                                                                                                 | (13)                |
| DL1                                  | Parental strain Challis                                                                                                                                                                                                    | (8)                 |
| UB1968                               | DL1; 266 bp SGO_2006 replaced by 913 bp <i>aad9</i> with no terminator                                                                                                                                                     | This study          |
| UB1890                               | DL1; 1960 bp SGO_2005 replaced by 1158 bp <i>aad9</i> with terminator                                                                                                                                                      | This study          |
| UB1964                               | DL1; 1454 bp SGO_2004 replaced by 1158 bp <i>aad9</i> with terminator                                                                                                                                                      | This study          |
| UB1545                               | <i>hsa::aphA3</i> (Kn <sup>r</sup> )                                                                                                                                                                                       | (7)                 |
| UB1360                               | $\Delta(sspA sspB)::aad9$ (Sp <sup>r</sup> )                                                                                                                                                                               | (6)                 |
| UB1552                               | <i>hsa::aphA3</i> $\Delta(sspA sspB)::aad9$ (Kn <sup>r</sup> Sp <sup>r</sup> )                                                                                                                                             | (7)                 |
| UB2031                               | DL1; <i>hsa::aphA3 padA::aad9</i> (Kn <sup>r</sup> Sp <sup>r</sup> )                                                                                                                                                       | This study          |
| <i>E. coli</i> strains               |                                                                                                                                                                                                                            |                     |
| DH5 $\alpha$                         | F <sup>-</sup> $\phi$ 80d <i>lacZ</i> $\Delta$ M15 $\Delta(lacZYA-argF)$ U169 <i>deoR recA1 endA1 hsdR17</i> (r <sub>k</sub> -m <sub>k</sub> <sup>+</sup> ) <i>supE44</i> $\lambda$ <sup>1</sup> <i>thi-1 gyrA96 relA1</i> | Invitrogen          |
| JM109                                | F <sup>+</sup> <i>traD36 proA' B' <math>\Delta(lacZ)</math>M15/<math>\Delta(lac-proAB)</math> glnV thi</i>                                                                                                                 | New England BioLabs |
| BL21                                 | F <sup>-</sup> <i>ompT hsdS<sub>B</sub> (r<sub>B</sub><sup>-</sup> m<sub>B</sub><sup>-</sup>) gal dcm</i> (DE3) pLysS (Cm <sup>r</sup> )                                                                                   | Novagen             |
| Plasmids                             |                                                                                                                                                                                                                            |                     |
| pGEM-7:sp <sup>R</sup>               | Spectinomycin-resistance (Sp <sup>r</sup> ) <i>aad9</i> determinant with terminator in pGEM-7Zf, (Ap <sup>r</sup> Sp <sup>r</sup> )                                                                                        | (8)                 |
| pET46                                | PCR product cloning vector incorporating x6 His NH <sub>2</sub> tag, (Ap <sup>r</sup> )                                                                                                                                    | Novagen             |
| pBluescript II SK(+)                 | Cloning vector, (Ap <sup>r</sup> )                                                                                                                                                                                         | Invitrogen          |
| pBS:sp <sup>Rt</sup>                 | Sp <sup>r</sup> <i>aad9</i> determinant with no terminator (sp <sup>Rt</sup> ) in pBluescriptII SK(+), (Ap <sup>r</sup> Sp <sup>r</sup> )                                                                                  | This study          |
| pBS:sp <sup>Rt</sup> $\Delta$ 2006   | Sp <sup>r</sup> determinant in pBS:sp <sup>Rt</sup> flanked by SGO_2006 and SGO_2005 regions, (Ap <sup>r</sup> Sp <sup>r</sup> )                                                                                           | This study          |
| pGEM-7:sp <sup>R</sup> $\Delta$ 2005 | Sp <sup>r</sup> determinant in pGEM-7:sp <sup>R</sup> flanked by SGO_2005 DNA amplicons, (Ap <sup>r</sup> Sp <sup>r</sup> )                                                                                                | This study          |
| pGEM-7:sp <sup>R</sup> $\Delta$ 2004 | sp <sup>r</sup> determinant in pGEM-7:sp <sup>R</sup> flanked by SGO_2004 DNA amplicons, (Ap <sup>r</sup> Sp <sup>r</sup> )                                                                                                | This study          |

**Table S2. Primers used in this study**

| Primer              | Primer location in genome | Sequence <sup>a</sup>                          | Annealing temperature <sup>b</sup> |
|---------------------|---------------------------|------------------------------------------------|------------------------------------|
| <i>Sst</i> 2006usF  | 2069663-2069686           | (TAGAGC) <u>TC</u> GATATTTGTACAGTGCTTGCTC      | 66                                 |
| <i>Bam</i> 2006usR  | 2069366-2069387           | (TAGGATCC <u>T</u> )AGCTAGCCCACTCTACTACCAG     | 66                                 |
| <i>Eco</i> 2006dsF  | 2069078-2069098           | (ATGAA) <u>TTC</u> CACGATGAAGCAGCGCTTG         | 62                                 |
| <i>Xho</i> 2006dsR  | 2068668-2068690           | (TACTCGA) <u>GTT</u> CTGGACTAACATATGTTGTC      | 62                                 |
| 2006tfJ             | 2069902-2069925           | GTCTTCGACTGGCTTGAATATAGG                       | 66                                 |
| <i>Xho</i> 2005usF  | 2068881-2068903           | (ATCTCG) <u>AG</u> TTGTTTCGAGCTGATGATCCTC      | 66                                 |
| <i>Eco</i> 2005usR  | 2068511-2068535           | (AT)GAATTCGCATCAGTATATACATTCG                  | 66                                 |
| <i>Hind</i> 2005dsF | 2066528-2066550           | (ATAAGCTT) <u>CT</u> GATCTTCAAGGCTAAGATTCG     | 64                                 |
| <i>Sst</i> 2005dsR  | 2065799-2065821           | (ATGAGCT) <u>CT</u> GATAACCGGTTTGTCTGTACC      | 64                                 |
| 2005tfJ             | 2069089-2069112           | AGTAATGACAGACTTTTCACGATGA                      | 64                                 |
| <i>Xho</i> 2004usF  | 2057867-2057888           | (TACTC) <u>GAG</u> CTGACACATGTCCCTACTG         | 62                                 |
| <i>Mun</i> 2004usR  | 2057542-2057563           | (ATCAAT) <u>TG</u> AGTCGTAATCTCTGGTTGAG        | 62                                 |
| <i>Hind</i> 2004dsF | 2056062-2056086           | (ATAAGCT) <u>TCA</u> AGTAATTTACCATGGCACTATC    | 64                                 |
| <i>Bam</i> 2004dsR  | 2055682-2055704           | (ATGGATC) <u>CT</u> AGAGTATTGAGGTTGTTGTGG      | 64                                 |
| 2004tfJ             | 2058006-2058028           | CTATGCTCTTCTGGTTACTATCG                        | 64                                 |
| HP1F                | 2068889-2068867           | (GACGACGACAAGATGG)ATGATCCTCTGAATATTGAGACG      | 55                                 |
| HP2R                | 2067913-2067938           | (GAGGAGAAGCCCGGTTT)ATTGCTCATTAACATAGAAGGAAACAT | 55                                 |
| HP3R                | 2066920-2066943           | (GAGGAGAAGCCCGGTTT)AGTCTTTTGTCTTGGCATGGGCATC   | 55                                 |
| HP4R                | 2065006-2065029           | (GAGGAGAAGCCCGGTTT)ATTCTTCCAAGGTATCAGAAAGTAC   | 55                                 |

<sup>a</sup> Primers were designed based on the annotated genome sequence of *S. gordonii* CH1 (GenBank accession number CP000725). Some primers were engineered with additional sequence (in parentheses) for cloning e.g. to generate restriction sites (underlined), or to encode an in-frame translational stop codon (italicized).

<sup>b</sup> *S. gordonii* CH1 chromosomal DNA template was amplified by PCR with an initial denaturation of 95 °C, 30 cycles of denaturation at 95 °C, annealing at the noted temperatures and extension at 72 °C, followed by a final extension at 72 °C for 10 minutes.

**Table S3. Characteristics of ORFs interrupted in *S. gordonii* DL1 by allelic replacement**

| <i>S. gordonii</i><br>CH1 SGO<br>number <sup>a</sup> | ORF size <sup>b</sup> |      | Leader<br>peptide<br>(aa) <sup>b,c</sup> | Putative functional<br>sub-domain <sup>d</sup> |                                      | Region of ORF replaced<br>by <i>aad9</i> <sup>b,e,f</sup> |         | Predicted MW of<br>encoded protein <sup>g</sup> |        |
|------------------------------------------------------|-----------------------|------|------------------------------------------|------------------------------------------------|--------------------------------------|-----------------------------------------------------------|---------|-------------------------------------------------|--------|
|                                                      | bp                    | aa   |                                          | Type                                           | Location in<br>ORF (aa) <sup>b</sup> | bp                                                        | aa      | Parent                                          | Mutant |
| SGO_2006                                             | 564                   | 187  | 27-28                                    | thioredoxin                                    | 56-172                               | 253-519                                                   | 85-173  | 21924                                           | 9531   |
| SGO_2005                                             | 10941                 | 3646 | 33-34                                    | vWF type A                                     | 72-229                               | 479-2438                                                  | 161-813 | 397305                                          | 9618   |
| SGO_2004                                             | 2424                  | 807  | 21-22                                    | G5                                             | 140-698                              | 431-1885                                                  | 145-630 | 86908                                           | 18391  |

<sup>a</sup> ORFs were located in the annotated genome sequence of *S. gordonii* CH1 (GenBank accession number CP000725).

<sup>b</sup> bp and aa indicate base pairs and amino acid residues, respectively.

<sup>c</sup> Predicted signal peptide cleavage site for Gram-positive bacteria, determined using Signal P (3)

<sup>d</sup> The presence of protein families of thioredoxin (PF00085) and vWF (von Willebrand Factor) type A domain (VWA; PF00092) were identified using BlastP (1). The presence of a thioredoxin domain in SGO\_2006 and vWA in SGO\_2005 suggests that these ORFs may be involved in cytochrome maturation (10) and platelet-binding to subendothelial connective tissue (reviewed in ref. 12). The protein family of G5 (PF07501) was determined using Pfam (5). Seven 78-amino acid G5 direct repeats were found in SGO\_2004; the presence of such repeats is implicated in binding to *N*-acetylglucosamine (2).

<sup>e</sup> The *aad9* gene has its own putative promoter region. In allelic replacement of SGO\_2005 and SGO\_2004, the *aad9* gene had a terminator region; in SGO\_2006, the *aad9* gene did not have this terminator.

<sup>f</sup> The reverse primer used to generate the upstream *S. gordonii* DL1 amplicon in SGO\_2006 was engineered with a translational stop codon (Table S2), thereby truncating the encoded protein upstream of the *aad9* gene.

<sup>g</sup> Predicted molecular mass (Daltons) of the encoded protein (including the predicted signal peptide) in the *S. gordonii* CH1 parent and respective mutant, in which part of the putative functional sub-domain was replaced by the *aad9* gene

**Table S4. Quantitative RT-PCR expression of SGO\_2005 and SGO\_2004**

| $\Delta\Delta C_t$ Analysis of SGO_2005 |        |                |                   |              |                    |                                                      |
|-----------------------------------------|--------|----------------|-------------------|--------------|--------------------|------------------------------------------------------|
| Experiment                              | Strain | SGO_2005 $C_t$ | <i>gyrA</i> $C_t$ | $\Delta C_t$ | $\Delta\Delta C_t$ | Fold Change ( $2^{-\Delta\Delta C_t}$ ) <sup>a</sup> |
| 1                                       | DL1    | 25.06          | 24.43             | 0.64         | 0                  | 1                                                    |
|                                         | UB1890 | 26.74          | 25.59             | 1.15         | 1.52               | 0.70                                                 |
|                                         | UB1964 | 25.83          | 25.27             | 0.55         | -0.08              | 1.06                                                 |
| 2                                       | DL1    | 25.48          | 25.72             | -0.24        | 0                  | 1                                                    |
|                                         | UB1968 | 23.14          | 23.32             | -0.18        | 0.06               | 0.96                                                 |

  

| $\Delta\Delta C_t$ Analysis of SGO_2004 |        |                |                   |              |                    |                                                      |
|-----------------------------------------|--------|----------------|-------------------|--------------|--------------------|------------------------------------------------------|
| Experiment                              | Strain | SGO_2004 $C_t$ | <i>gyrA</i> $C_t$ | $\Delta C_t$ | $\Delta\Delta C_t$ | Fold Change ( $2^{-\Delta\Delta C_t}$ ) <sup>a</sup> |
| 1                                       | DL1    | 24.51          | 24.43             | 0.08         | 0                  | 1                                                    |
|                                         | UB1890 | 26.55          | 25.59             | 0.96         | 0.88               | 0.54                                                 |
|                                         | UB1964 | 26.03          | 25.27             | 0.75         | 0.67               | 0.63                                                 |
| 2                                       | DL1    | 24.93          | 25.72             | -0.79        | 0                  | 1                                                    |
|                                         | UB1968 | 22.62          | 23.32             | -0.70        | 0.09               | 0.94                                                 |

<sup>a</sup> Relative expression normalized to *gyrA* of the mutant strains with disrupted SGO\_2004 (strain UB1964), SGO\_2005 (strain UB1890) or SGO\_2006 (strain UB1968) as compared to strain DL1 in same experiment.

| Primer                 | Sequence 5'-3'       | $T_m$ (°C) |
|------------------------|----------------------|------------|
| 2005 Upstream          | AATCTTCGCAATGGCTTCTG | 60.36      |
| 2005 Downstream        | GGCAACCCTATCAAAGATGC | 59.54      |
| 2004 Upstream          | AAGATCAAGCGAAACCAGGA | 59.81      |
| 2004 Downstream        | CAAAGCCATTTGCATGTTCA | 60.64      |
| <i>gyrA</i> Upstream   | GAACGTGCAACGGAGCTTAT | 57.86      |
| <i>gyrA</i> Downstream | ACCTCCACGTTTTTGAGCTG | 58.77      |

## SUPPLEMENTAL MATERIALS AND METHODS

RNA was prepared from mid-log *S. gordonii* cells grown in Todd Hewitt broth, as previously described (13). Briefly, cultures were extracted with hot acid-phenol and precipitated RNA was suspended in DEPC water and purified via an RNeasy Midi spin column (QIAGEN). After DNase treatment to remove any remaining DNA, the RNA was purified with a second RNeasy midi spin column, eluted in RNase-free H<sub>2</sub>O with 0.4 Units RNaseOUT™ (Invitrogen) /μl to prevent degradation, and stored in portions at -80°C.

Primer3 software (<http://frodo.wi.mit.edu/primer3/input.htm>) (11) was used to design primers for real-time PCR. Input parameters for primer pairs were a 150-bp target amplicon size, 20-bp primer sequence length, a G-C content of 40-60% for the primer sequences, and an annealing temperature range of 59 - 61°C. All primers were checked against the *S. gordonii* genome sequence to confirm specificity.

RNA from strains DL1, UB1890, UB1964 and UB1968 were templates in real-time PCR to determine the expression of SGO\_2005, SGO\_2004 and *gyrA*. The iScript One-Step RT-PCR Kit with SYBR Green (BioRad) was used according to the manufacturer's directions for reverse transcription and labeling of cDNA. Real-time data were collected using the MyiQ™ Single-Color Real-Time PCR Detection System (Bio-Rad). Data were analyzed using the Livak ( $2^{-\Delta\Delta C_t}$ ) Method (9) and expression of SGO\_2005 or SGO\_2004 were reported as a fold-changes normalized to *gyrA* expression in each strain.

## Legends to Supplemental Figures

**Fig. S1.** Panel A: diagrammatic representation of a 19,060-bp *S. gordonii* Challis CH1 (Genbank CP000725) chromosomal region. The arrows in the CH1 map indicate the direction of transcription and relative size and position of each ORF. A 4,500-bp region within SGO\_2005 (at 1000-2500 amino acids) is indicated by hatch marks. ORFs designated in the CH1 annotated sequence are labeled with SGO numbers. A predicted promoter (P) sequence was found upstream of SGO\_2006 using BPROM software available from Softberry (Mount Kisco, NY; www.softberry.com) and a putative terminator (stemloop) sequence was found downstream of SGO\_2004 using mfold (14). The hatched arrow labeled “rrp” is not designated in the current version of the *S. gordonii* CH1 annotated genome. However, this ORF is present and a BlastP search (1), determined that it encodes a 50S ribosomal protein L33 with 84 % amino acid identity to spr1822 (NP\_359414) in *S. pneumoniae* R6 (Genbank AE007317). The expanded mutant map above shows details of the location of the putative functional subdomains (in black) of SGO\_2006 (thioredoxin domain; PF00085), SGO\_2005 (von Willebrand Factor type A domain; PF00092) and SGO\_2004 (seven G5 domain direct repeats of 78 amino acids each; PF07501). The amino acid position of these domains is indicated by the numbers below each arrow. The amino acid numbers above each arrow designate the position of the cloned fragment containing the *aad9* gene (encoding spectinomycin resistance, Sp<sup>R</sup>), amplified from pGEM7:*aad9* with its native promoter and with (SGO\_2005 and SGO\_2004), or without (SGO\_2006), a transcriptional terminator. Linear fragments from plasmids containing the appropriate homologous streptococcal DNA flanking the directionally-cloned *aad9*-containing amplicon were used to construct three individual gene mutants by allelic replacements in SGO\_2006, SGO\_2005 and SGO2004. Details of construction of the mutant strains are provided in the **Materials and Methods** section. Panel B: predicted product of each ORF shown in the *S. gordonii* CH1 chromosomal map in panel A.

**Fig. S2.** Features of PadA (3646 aa residues) primary sequence include: leader peptide (1-33 aa); N-terminal region (blue print, equivalent to Fragment II in Fig. 1) comprising vWF-like domain (72-229 aa, underlined) and two cysteine residues (C55 and C508, purple shaded); fourteen aa residue repeat blocks (1329-3485 aa, green, yellow and blue shading); cell wall anchorage region (3541-3618 aa); sortase motif LPKGTG (3614-3618 aa, purple shaded).. For repeat blocks numbers 1 (green shaded), 13 (green shaded) and 14 (shaded light blue) the sequences tend to diverge. Repeat blocks 1-12 each contain 148-152 aa residues, while repeat blocks 13 and 14 contain 176 aa residues and 179 aa residues respectively. More specifically there is duplication of two super repeat blocks each of 755 aa residues consisting of 5 aa residue repeat blocks: repeat blocks 2-6, 1479-2230 aa residues (designated RP1, 755 aa) (red typeface underlined in red) and repeat blocks 7-11, 2231-2982 aa residues (designated RP2, 755 aa) (black typeface underlined in black). The von Willebrand factor type A (vWA) domain is the prototype for a domain of widespread occurrence involved in a variety of cellular functions (4). It possesses no significant sequence similarity to any known protein structure. Secondary structure predictions suggest a largely alternating pattern of six alpha-helices and six beta-strands. A protein fold for this domain is proposed to correspond to a doubly-wound open twisted beta-sheet structure flanked by alpha-helices ( $\alpha/\beta$  para-rossman type of fold). In vWf the domain forms multimers.

**Fig. S3.** Analysis of recombinant PadA polypeptides by SDS-PAGE stained with Coomassie Blue. Fragment I (346 aa residues) with predicted  $M_r$  36.2 kDa showed retarded migration in SDS-PAGE with apparent  $M_r$  approximately 53 kDa. Fragment II (657 aa residues) with predicted  $M_r$  73 kDa migrated at apparent  $M_r$  80 kDa. Fragment III (1295 aa residues) showed predicted and apparent  $M_r$  142 kDa.  $M_r$ , molecular mass markers in kilodaltons.

**Fig. S4** Glycoprotein (GP) IIb/IIIa transfected CHO cells or mock infected cells (vector only), were incubated with 10 µg/ml phycoerythrin (PE) labelled primary antibody (mouse anti-CD41, clone SZ22) or isotype control antibody for 20 min at room temperature. The samples were then diluted in 1 ml PBS and analyzed on a FACS-CALibur flow cytometer (San Jose, CA, USA) using CellQuest Pro software. Panel A, separation of mock or GPIIb/IIIa transfected cells; panel B, CD41 gated binding levels for mock or GPIIb/IIIa transfected CHO cells; panel C, Western immunoblot of lysates from mock or transfected cells reacted with anti-CD41 antibody and peroxidase-conjugated anti-mouse secondary antibody, showing GPIIb/IIIa expression.

**Fig. S5.** Alignment of amino acid sequences of vWf (GenBank accession number P04275) and PadA. There is no significant amino acid sequence identity. Shaded yellow is the A1 domain of vWf showing only weak homology to PadA. The motif in vWf interacting with platelet GPIIb is highlighted in green. Shaded red is the C1 domain of vWf again showing only weak homology with PadA. The vWf motif interacting with platelet GPIIb/IIIa is highlighted in green.

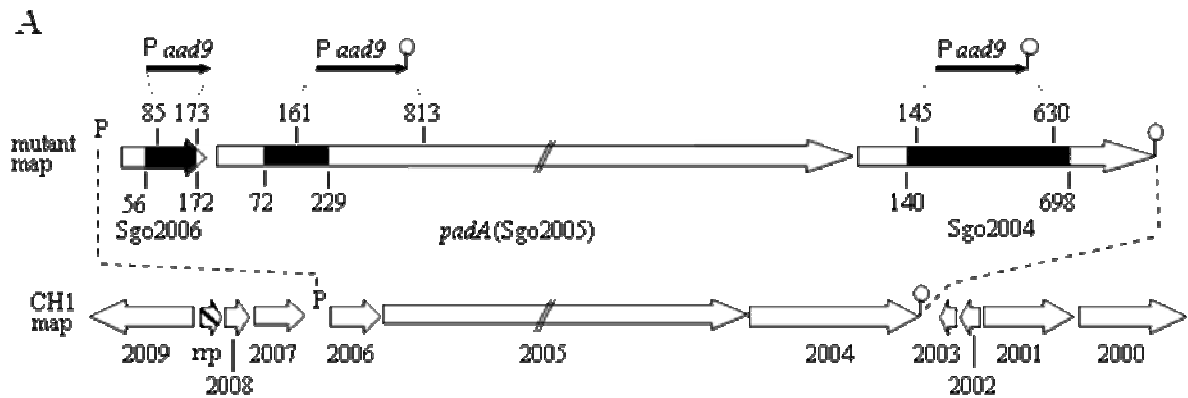

**B**

- SGO\_2009: zinc proteinase
- rrp: 50S ribosomal protein L33 homolog
- SGO\_2008: preprotein translocase SecE component-related protein
- SGO\_2007: transcription termination/antitermination factor NusG
- SGO\_2006: thioredoxin signature protein
- SGO\_2005: LPXTG cell wall surface protein (PadA)
- SGO\_2004: LPXTG cell wall surface protein
- SGO\_2003: structural tRNA (Cys tRNA)
- SGO\_2002: hypothetical protein
- SGO\_2001: *rpsB* ribosomal protein S2
- SGO\_2000: translation elongation factor Ts

### Supplemental material

**Figure S1. Structure of the *padA* locus and sites of insertion of *aad9* to generate mutants.**



Leader peptide

1 MKDFLKKVLILFTVLLMSMPSSVNLNLTGSVVRADDDPLNIETRRIDEHTTITQNGCYRKIE  
61 KTDATDWTVPRKPIDLVLIQDASGSFRITIPSVKNALKRLTTYVSPEQYDENDPHLVKTD vWF-like domain  
121 DPTTDRVFVASYQGLDQVRYFENNDFSGNPANVYTDANSTGKNYTYGNSGLTSDQNKVH  
181 NFIDNIAVDGGTPTVPAIDDTIAQYNRVKGNMENGKRTVFLVTDGVDVANGYRLPGTNTVV  
241 MDKSWTRTDAIQAWRVDSYPEAAQDIIGRANELKAAGNQLKAAVGVSEGSVVVGFWERVD  
301 NFKTEKYYQYGPAYLNGFGNTINIGDNRVQAI FHDALQSMASPDKVVNGKNVSYFYVNEQN  
361 NIDVFSQKILESVAALVKDDITGEFDITEGYKVD AIRINGKKIVPKVTDPSKEIRGTIT  
421 QTGNKVKISVPDSVFNPGKNSFDYDLSKEARAPETDEDSEVDPPENYVPEKEEITVPELT  
481 GKFKAGDFETRQIGGRNQTVVEVQKLEYCYPSATKTVKDADASNDIGVIPDPLELTKKPSY  
541 SAQLSKKDEEFTYTVDYNFNVPYEFKENVMLTDPIDYRLEVVSASHAQGPDGQSWPTRV  
601 TQQDAGGNSQSVVADVPPQKDYNYLIMKKAKLKMTVRLKEEYRKNQASKAYLAILQNN  
661 NGYGLVNGQINIMWNGEDDSPNQDAHAKTKDKASTIRRSNPIYVKPPLDTEVDKKNVNEKEH  
721 EGLQADGEEFEYKVTAPWPGIADKFTLTDTVVDELEIVPNSAKVTIVAGKSYNALTKAISI  
781 NGQTIDITLTKAQLTSLNRLISRRGGSEVQEI EELIFKAKIRPGADLSKYKKNGAVNIPNT  
841 ADVILNDKKKTSKEVTVTPPKPKPTVSKKINNTLDSLVTFDGQPYTYNITTAVPSDVAG  
901 YKFFVISDKLDLADDFDQASISGLPADVFEIQTNQGTVTATVKEGKFKELAKYSFVELT  
961 IPAKVKAGVTGKTIENKAKISFTNENNAKEVESNPVTVTPPPVTKKINENLDHLDIATG  
1021 QPYKYNVKTTLPSDITSYKEFVIDTLEDELSVINEGTDKPVISGPAEFFDVTVSGQKV  
1081 TATMKNFAGASALAGQEI EELVIPA KINDGVTRSNIPNKATFSFKDKNDHKGEKETIPVTV  
1141 TPTTEPNVSKKINGDQDNATIAAETDFTYNIKTTLPNIDITYKSAITDTLDENLGVVNP  
1201 EPSISEEAKKFFDITVSGNTVATMKDFAKASALANKEI EELVIHAKVKKESVLP EIPNTA  
1261 KITTYTNKNNESKEKETEPVKVTPPPITKKVNGKDQEDLASLTSFKYTVDSKVP I VADKF  
1321 VLSDTLEKVLTFDGDATVTDIGQTVTDVTVAKKDQKLTVTDFDKDQVKKYAGKAVQVAFDA  
1381 KIKSGYTVDQVLVAKYPNGDKAAIPNKASFVNDNPETEKF SNPVTVTPPPPNTPEIEKKV  
1441 NGADSYNLQTRLEEFYSLNTAMPTNATEFTVDELKSVLEFAGKKGDVQVKIDGKAAND RP1 755 aa  
1501 QATISTDKNLTVAFAEKAVKANAGKSI EIVTFKAKIREGANLLDYLVPGGQIRIPNKASY  
1561 DIDHNPKFHKDSNEVPVTPPSPEQPPIEKDVNDKAEATLEARDEEFTYHVTKIPYEATA  
1621 FNITDTLKEVLEFSGEKGQATVVDGKLLSDPHIAINGQITVTLNQEELKANADKEIKL  
1681 TPKAKIRPNANLAAYVVGDKVIVNNQASYNVLDLFDNPGVHKDSNIVPVTPPSPEKPEIEY  
1741 TVNDAKEATLANRDEIFTYKVKTRVFFDATAFSDDTIKVLEFADAGSATLNGEAL EAD  
1801 RISIADQKITLTLTEDQVKNNGGKEVVLTFKAKIROGANLSGYIEKGKTVINNQASYNAA  
1861 FPNDFPNFHKDSNIVPVTPPNPNPPIEKKVNEAESANL GARDEEFTYITDITVPLDVTGF  
1921 AVYDTIEKVLRESGENGQASAVDQQLDASHITIKGQKITVKNTEDEAKALGKAVHVS  
1981 FRAKIRAGANLSDYIERDGTIRIYNTAKYFNNDPGTEQSSKPVVPIPTTPEPELKKEV  
2041 NGKEABTDANRDEEFTYITVKTVPVQDATAFSDGSLVLEFAGEDAEASLTLNGEKLDA  
2101 KQIKLKDQTI SAELTEAQVKANGGKEVVLNFKAKIREGANLADYIEADGVTRVPNKASYV  
2161 ANFPHRPKVEKDSNIVPVTPPSPENPPVEKKVNNKPSATLDSRDEEFTYITDKVPVDAT  
2221 GFKITDELKDLEFSGKAGQAVTVVDGADVLEFSQITVQAVTVVTLTADQVKNYGNKA  
2281 VNVSEKAIKKNVSLAGYIANGVTRIPNIAKYLINDDFIKKSTEEVYVPPSPEEGL  
2341 KPEVNGQPTALPEYERFTYKVTTSVVDATAFVSDDTAVVLEFSGEKGQATATLDGQ  
2401 EIDANRINVAQDITSMALTEDEVKANGGKEVTLTFKAKIREGANLSAYIEKGKTSIPNTA  
2461 SYTAGFPNRPDIHKDSNRVPTPPTPEEPEIKKDVNGKEETLANRND EFTYHINTKVPF  
2521 DATAFSINDELKDLEFADGTGRATASLNGALDADRISINGQITVNLTEDEVKNNGC  
2581 DQVTFANFQVNSCHINQKTSINQASVVDTPNNDQVKNIEVFTPTPEE  
2641 FIEKKVNEAESANL GARDEEFTYITDITVPLDVTGFAVYDTIEKVLRESGENGQASATVD  
2701 GQPLDASHITIKGQKITVKLTEDEAKALGGKAVHVSFKAKIKAGANLSDYIEKDGTTRIY  
2761 NTAKYFNNDPGTEQSSKPVVPIPTTPEPELKKEVNGKEAETLANRDDVFTYTVKTTVP  
2821 QDATAFSISDKLEDLEFAGKAGATLAGEDKADQITTDGQIKLTLTEDQVANGGKEV  
2881 VLNFKAKIREGANLSAYIEKADKAEPNTASYVNGFNKPAYKDSNEVPVTPPSPEEGL  
2941 ERDYNKPSSETIADNTEFTYNIHTTNPQDAIGFTVYDELKIVLEFAGDVQVTLGGKKAD  
3001 AAVAKNGQTL E VTFPEETVKANGGKQVTFKAKIKADADLTPYETANSYSVPNTASYLI  
3061 NNNPTSKKETKPVTVVEVPKQPGPEVTKKINRTLDHLDVDRDVPYMYNVNTQIPKDIRLYK  
3121 EFTVTDITLEFVLEITGTPVAVVDGYATDAVETKVEGNTVTVTKDFARISGYKEIQLYIF  
3181 AKLKADSDLSAYENQTVPNKATI AFKDSNGKNGTKESNPVTVRPRDPEKPEEPKPNPAK  
3241 TVGPDGNSNPSTAYRLKELKEGFRFDVTAKVPTDPVDESGNPIKDAQGRDVKTELNSFTV  
3301 TDELEKVLKVDRAVAVKVEENKVAEAI AKITAKIEKAESDLKELEGKETNGTFAKKLAEAE  
3361 KKVEELTAQLAAAKEKAAAAPATPAPASDS DAGNATATPAPADNNAEVAALEESLAAAQA  
3421 ELEQLKADGAKAGNLATPEEQKVEQDKLNKNLEQLKESKEKLEKALEAFTTVNDKGEITD  
3481 EALAKIAKVTVEGQKVTVEVTDKAVLEALKGSTFRVIIYSSIKDGADLSSYLNKENNETK  
3541 IPNKATVTFNDKPKVTNTVNVYPPPEPTTPPQTPPHPTPTTPGTPPPTTPDTPPAPKGDLP  
3601 PAPTPEPEKPKNI LPKTGTSATMVNEVIIGMILVLMGLLLRRRPPKH CWA

Supplemental material  
Figure S2. Primary sequence of PadA highlighting regions of interest and potential functional significance

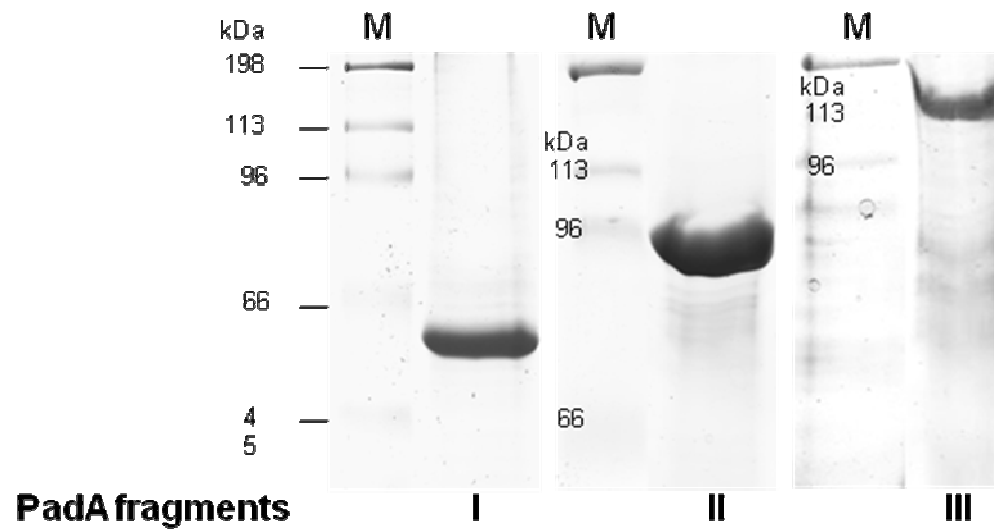

**Supplemental material**  
**Figure S3.**  
**SDS-PAGE gels of purified PadA protein fragments I, II and III.**

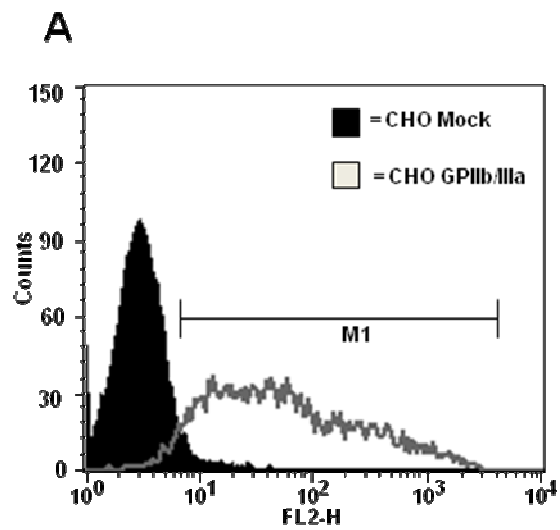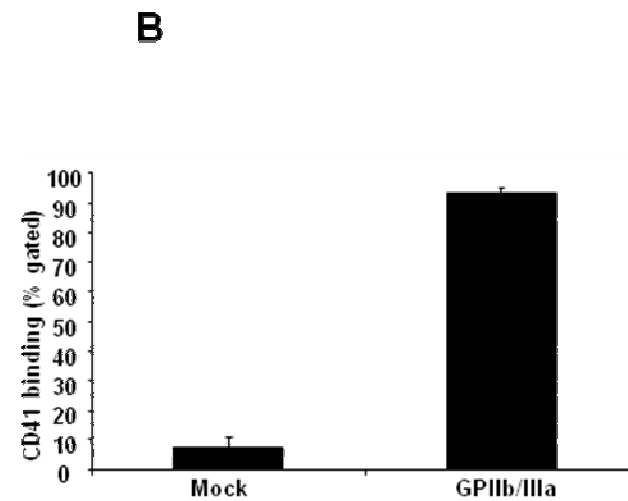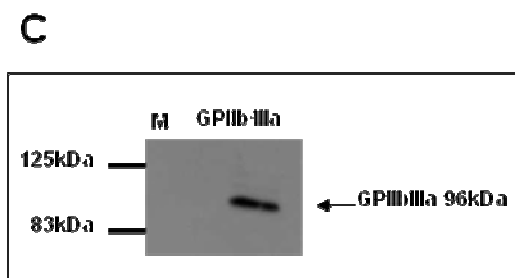

**Supplemental material**  
**Figure S4.**  
**CHO cells expressing GPIIb/IIIa**



Petersen et al., 2009. Platelet Receptor GPIIb/IIIa Interaction with PadA

vWf YVLVQDYCGS-----NPGTFRILVGNKGCSPVSKCKKR-----V 925  
 PadA TATMKNFAGASALAGQEIELVIPAKINDGVTRSNIPNKATFSFKDKNDHKGEKETIPVTV 1140  
 . : : : : \* : \* \* . \* : \* \* . \* : : \* \*

vWf TILVEGGEIELFDG-----EVNVKRPMDETHFEVVESGRYIILLGKALSVVWDR 976  
 PadA TPTTEPNVSKKINGDQDNATIAAETDFTYNIKTTLPNIDITYKSFATDTLDENLGVVNP 1200  
 \* . \* . : : \* \* . \* . : : \* : : \* . \* :

vWf HLSISVVLKQTYQEKVCG-----LCGNFDGIQNNDLTSSNLQVEEDPVDFGNSW 1025  
 PadA EPSISSEAKFFDITVSGNVTATMKDFAKASALANKEIELVIHAKVKESVLPPEIPNTA 1260  
 . \* \* \* \* : : : \* \* \* . . : : : : : : \* . : : \* :

vWf KVSSQCADTRKVPDLSSPATCHNNIMKQTMVDSSCR-----ILTSDFVQDCNKL 1074  
 PadA KITYTNNKNESKEKETEPVKVTPPPITKKVNGKDQEDLASLTSTFKYTVDSKVPVADKF 1320  
 \* : : . . . : : \* . . : : : : . . . : \* \* \* : : :

vWf VDPEPYLDVCIYDTCSCESIG----- 1095  
 PadA VLSDTLEEVLTDFGDATVTIDGQVTDVTVAKKDQKLTVTFDKDQVKKYAGKAVQVAFDA 1380  
 \* . . . : \* : \* : : \* .

vWf -----DCACFCDTIAAYAHVCAQHGVVTVRWTATLCP----- 1127  
 PadA KIKSGYTVDLVAKYPNGDKAAIPNKASFVVDNDNPETEKFVSNPVTVPVPPNTPEIEKKV 1440  
 \* \* : : : : : : \* . . \* \* \*

vWf QSCEERNLRENGYECWEVRYNSCAPACQVTCQHPEPLACPVCVEG-----CHAHCP 1178  
 PadA NGADSYNLQTRLEEFYSLNTAMPNATEFTVTDLKSVELEFAGKKGDVQVKIDGKAAND 1500  
 : . . . \* \* : . \* : \* : \* : . : \* . : : . : \*

vWf PGKILDELLQTCVDPEDCPVCEVAGRRFASGKKVTLNPSDPEHCQICHCDVVNLTCEACQ 1238  
 PadA QATISTDKNTLTVAFAEKAVKANAGKSIEVTFKAKIREGANLLDYLVPGGQIRIPNKASY 1560  
 . . \* : \* : \* \* \* : \* . . . : : : : : \* .

vWf EPGG-----LVVPPTDAPVSPTTLYVEDISEPPLHD----- 1269  
 PadA DI **DHNP**KFHKDSNEVPVTPPSPEQPPIEKDVNDKAEATLEARDEEFYHVTKIPYEATA 1620  
 : . : \* \* . . . \* \* \* \* \* \* .

vWf **FYCSRLDLVFLLDGSSRLSEAEFEVLKAFVVDMMERLRISQKWRVAVVEYHGDGHAYI** 1329  
 PadA **FNITDITLKEVLDVDFSGEKGQAEATVDGKKLSDDHIAINGQTIITVTLNQEELKANADKEIKL** 1680  
 \* : \* . \* : : \* . . : \* \* : : \* . : : : : : : : : : : : : : : : : : :

vWf **GLKDR**KRPSE--LRRIASQVKYAGSQVASTSEVLKYLTFQIFSKID----RPEASRIAL 1382  
 PadA **TFKAKIRPNANLAAYVVGDKVINNOQASYNVDLPDNPVGHKDSNIVPVTPPSPEKPEIEK** 1740  
 : \* : \* \* . : : : . . \* : : . : : . : : \* : \* \* \* \* . . \*

vWf **LLMASQEPQMRSRNFVRYVQGLKKKKVIVIPVGIGPHANLKQIRLIEKQAPENKAFVLS** 1442  
 PadA **TVNDAKEATLANRDEIFTYKVKTKVPFDATAFSIDDTIKDVFLEFADAGSATLNGEALEAD** 1800  
 : : : \* . . \* : : : : \* . . . . \* . : : \* . \* : : :

vWf **VDELEQQORDEIVSYLCDLAPAEPPPTLPPHMAQVTVGP**GLLVSTLG-----PKRNSM 1495  
 PadA **RISIAQDKITLTLTEDQVKNNGGKEVVLTFKAKIRQGAN**LSGYIEKGTVINNOQASYNAA 1860  
 . : : \* : : . : : . . . . \* : : \* . \* \* \* . . \* :

vWf VLDVAFVLEGSDKIGEADFNRSKEFMEEVIQRMDVG-----QDSIHVTVLQY 1542  
 PadA FPNDPNFHKDSNIVPVTPPNPENPPIEKKVNEAESANL GARDEEFTYITDITVPLDVTGF 1920  
 . : . . : \* : : : \* : : \* : : : . : : : : \* :

vWf SYMVTVEYPFSEAQSKGDILQRVREIRYQGGNRTNTGLALRYLSDHSFLVSQGDREQAPN 1602  
 PadA AVYDTIEKVLFEFSGENQASATVDGQPLDASHITIKGQKITVKLTEDEAKALGGKAVHVS 1980  
 : \* : \* : . : : \* : \* : : : \* . \* : . . : \* : : .

vWf LVYMTGNPASDEIKRLPGDIQVVPVIGVGNANVQELERIG-----WPNAPIILQDF 1654  
 PadA FKAKIKAGANLSDYIEKDGTTRIYNTAKYFNNDPGTEQSSKFPVVPPTPEPELKKEV 2040  
 : : . . . . : . . \* : : . \* \* : . \* . \* \* \* : : .

vWf ETLPREAPDLVLQRCCSGEGLQIPTLSPAPDCSQPLDVILLDGSFFPASVYFDEMKSFA 1714  
 PadA NGKEAETLANRDDVFTYTVKTTVPQDATAFSISDSLVPVLEFAGEDAEASLTLNGEKLDA 2100  
 : \* : : : \* . . \* . \* \* \* : \* : \* . . : : : \* \*

vWf KAFISKAN-IGPRLTQVSVLQYGSITTDVPWNVVPEKAHLLSLVDVMQREGGSPQIGDA 1773  
 PadA KQIKLKDQTI SAELTEAQVKANGGKEVVLNFKAKIREGANLADYIEADGVTRVPNKASYV 2160  
 \* : \* : \* . . \* \* . . \* . . : : \* \* \* \* . : : . \* . . .





## SUPPLEMENTAL REFERENCES

1. **Altschul, S. F., W. Gish, W. Miller, E. W. Myers, and D. J. Lipman.** 1990. Basic Local Alignment Search Tool. *J. Mol. Biol.* **215**:403-410.
2. **Bateman, A., M. T. G. Holden, and C. Yeats.** 2005. The G5 domain: a potential N-acetylglucosamine recognition domain involved in biofilm formation. *Bioinformatics* **21**:1301-1303.
3. **Bendtsen, J. D., H. Nielsen, G. von Heijne, and S. Brunak.** 2004. Improved prediction of signal peptides: SignalP 3.0. *J. Mol. Biol.* **340**:783-795.
4. **Edwards, Y. G., and S. J. Perkins.** 1995. The protein fold of the von Willebrand factor type A domain is predicted to be similar to the open twisted beta-sheet flanked by alpha-helices found in human ras-p21. *FEBS Lett.* **358**: 283-286.
5. **Finn, R. D., J. Mistry, B. Schuster-Bockler, S. Griffiths-Jones, V. Hollich, T. Lassmann, S. Moxon, M. Marshall, A. Khanna, R. Durbin, S. R. Eddy, E. L. L. Sonnhammer, and A. Bateman.** 2006. Pfam: clans, web tools and services. *Nucl. Acids Res.* **34**:D247-D251.
6. **Heddle, C., A. H. Nobbs, N. S. Jakubovics, M. Gal, J. P. Mansell, D. Dymock, and H. F. Jenkinson.** 2003. Host collagen signal induces antigen I/II adhesin and invasin gene expression in oral *Streptococcus gordonii*. *Mol. Microbiol.* **50**:597-607.
7. **Jakubovics, N. S., S. W. Kerrigan, A. H. Nobbs, N. Stromberg, C. J. van Dolleweerd, D. M. Cox, C. G. Kelly, and H. F. Jenkinson.** 2005. Functions of cell surface-anchored antigen I/II family and Hsa polypeptides in interactions of *Streptococcus gordonii* with host receptors. *Infect. Immun.* **73**:6629-6638.
8. **Leblanc, D. J., L. N. Lee, and J. M. Inamine.** 1991. Cloning and nucleotide base sequence-analysis of a spectinomycin adenylyltransferase *aad9* determinant from *Enterococcus faecalis*. *Antimicrob. Agents Chemother.* **35**:1804-1810.



9. **Livak K. J., and T. D. Schmittgen.** 2001. Analysis of relative gene expression data using real-time quantitative PCR and the  $2^{-(\Delta\Delta C(T))}$  Method. *Methods*. 25:402-4088.
10. **Loferer, H., M. Bott, and H. Hennecke.** 1993. *Bradyrhizobium japonicum* TlpA, a novel membrane-anchored thioredoxin-like protein involved in the biogenesis of cytochrome aa3 and development of symbiosis. *EMBO J.* 12:3373-3383.
11. **Rozen S. and H. J. Skaletsky.** 2000. Primer3 on the WWW for general users and for biologist programmers. In: Krawetz S, Misener S (eds) *Bioinformatics Methods and Protocols: Methods in Molecular Biology*. Humana Press, Totowa, NJ, pp 365-386
12. **Sadler, J. E.** 1998. Biochemistry and genetics of von Willebrand factor. *Annu. Rev. Biochem.* 67:395-424.
13. **Vickerman M. M., S. Iobst, A. M. Jesionowski, and S. R. Gill.** 2007. Genome-wide transcriptional changes in *Streptococcus gordonii* in response to competence signaling peptide. *J. Bacteriol.* 189:7799-80
14. **Zuker, M.** 2003. Mfold web server for nucleic acid folding and hybridization prediction. *Nucl. Acids Res.* 31:3406-3415.
